# Supplementary material
Source: publisher figshare collection journal article supplement (https://tandf.figshare.com/ndownloader/files/17854427)
Supplement: Supplementary file 1 [file 17854427]

**Supplementary information**

**A data-driven approach to predicting the attachment density of biofouling organisms**

Andre E. Vellwocka, Jimin Fua, Yuan Mengb, V. Thiyagarajanb, Haimin Yaoa,*

*aDepartment of Mechanical Engineering, The Hong Kong Polytechnic University, Hung Hom, Kowloon, Hong Kong SAR, China*

*bThe Swire Institute of Marine Sciences and School of Biological Sciences, The University of Hong Kong, Hong Kong SAR, China*

*Corresponding author, E-mail address: mmhyao@polyu.edu.hk (H. Yao)


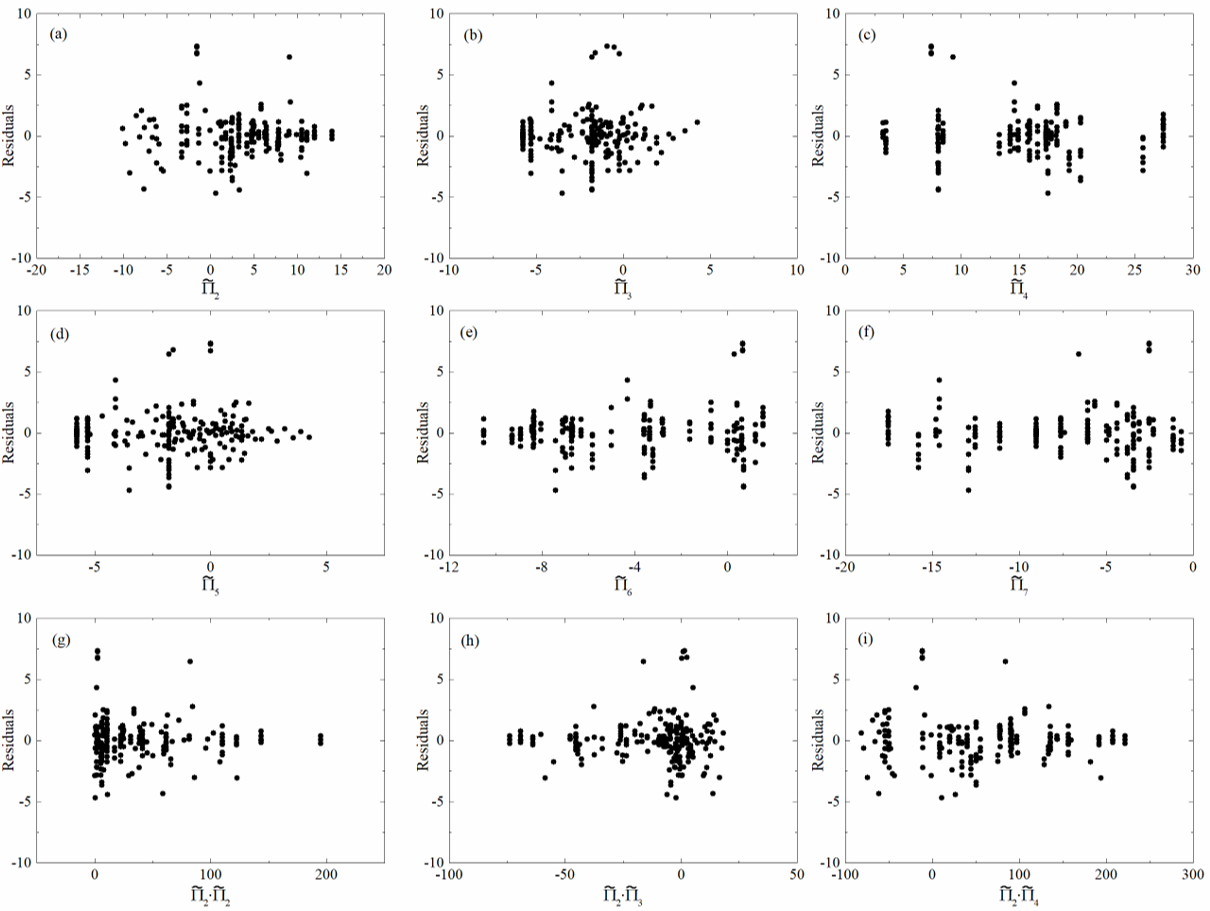


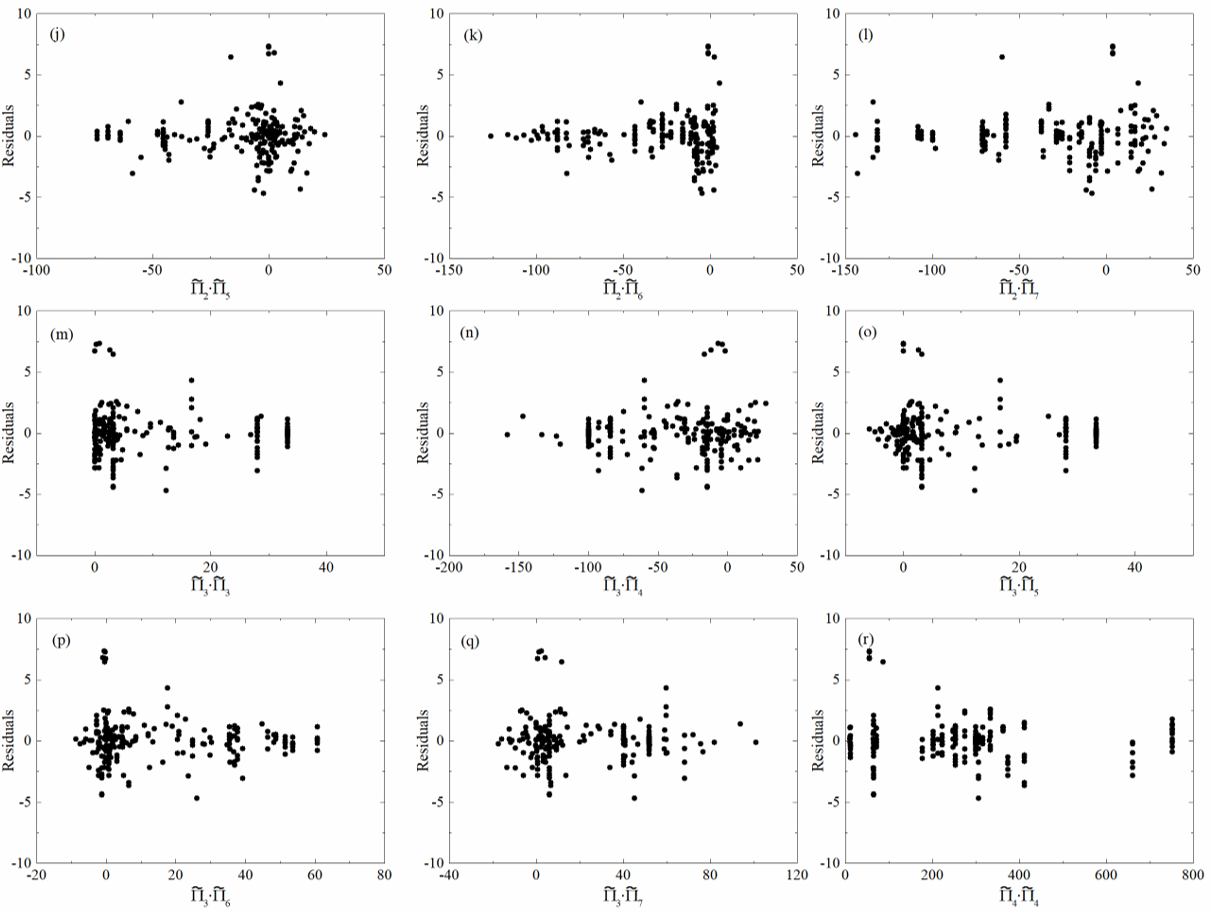


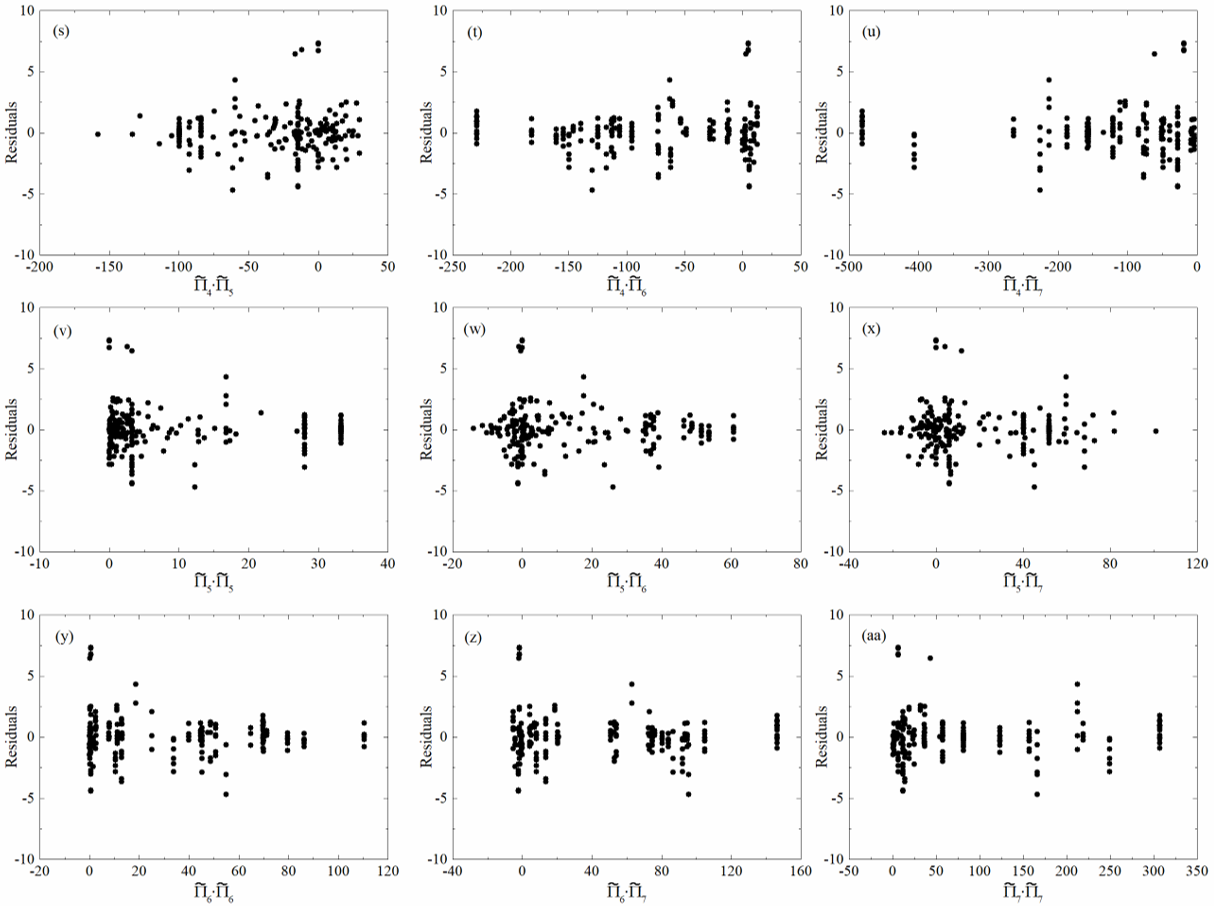


Figure S1. Distribution of the residuals in the spaces of different independent variables and their products.
